# Supplementary material for: Enhancing the brightness of CsPbBr3 quantum dot electroluminescence light-emitting diodes by manipulation of PEDOT:PSS films
Source: Royal Society of Chemistry journal article supplement (doi:10.1039/d1tc03943a), 2021-01-01
Supplement: d1tc03943a1.pdf [file d1tc03943a1.pdf]

## Supporting Information

### Enhancing the Brightness of CsPbBr<sub>3</sub> Quantum Dots Electroluminescence Light-Emitting Diodes through the Manipulation of PEDOT:PSS Films

Zhen Wang<sup>a</sup>, Yue Peng<sup>a</sup>, Yongsheng Lu<sup>a</sup>, Xiaosheng Tang<sup>\*a</sup>, Xing Tan<sup>a</sup>, Zhenshan Liang<sup>a</sup>, Qiang Huang<sup>a</sup>, Fei Qi<sup>a</sup>, Nan Zhang<sup>a</sup> and Weiwei Chen<sup>\*a</sup>

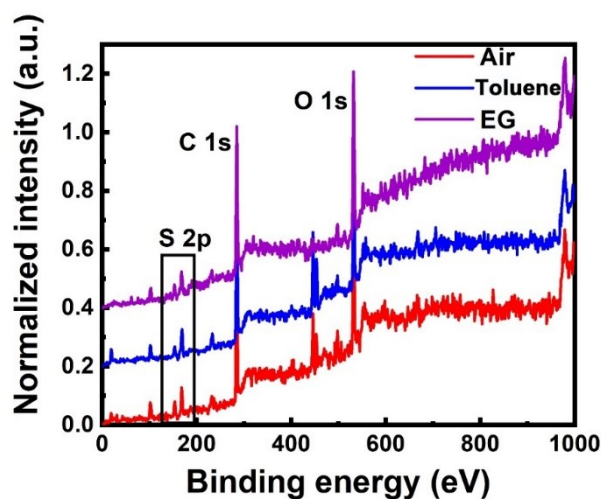

Fig. S1 The wide XPS spectra of PEDOT:PSS thin films prepared with air annealing, toluene vapor annealing, and EG-washed.

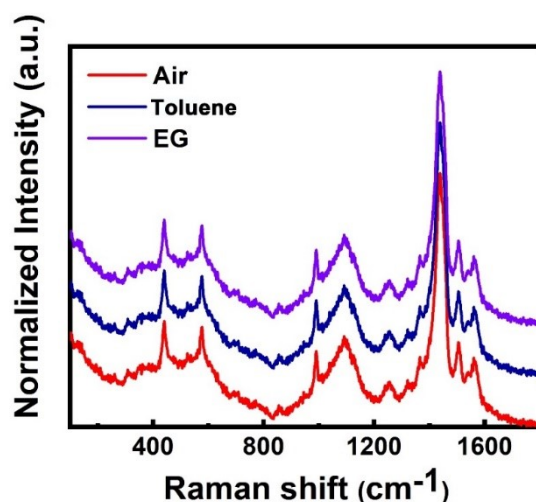

Fig. S2 Raman spectra of air annealed, treated with toluene vapor and EG-washed PEDOT:PSS films.

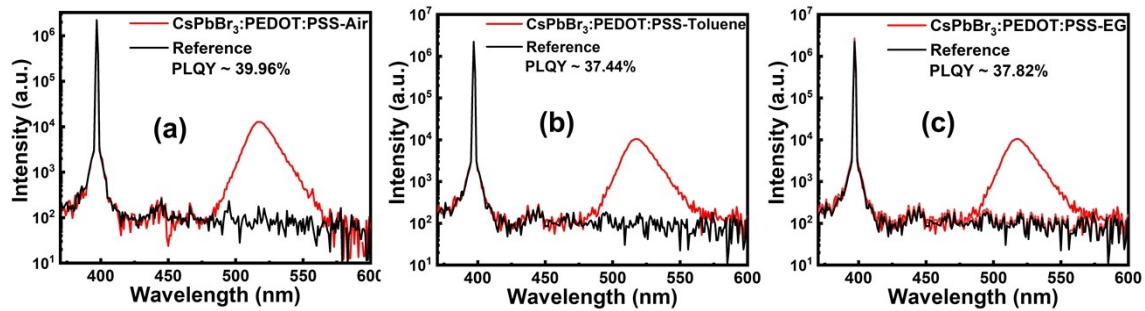

Fig. S3 The PLQY of the CsPbBr<sub>3</sub> QDs spin-coating on the PEDOT:PSS films.

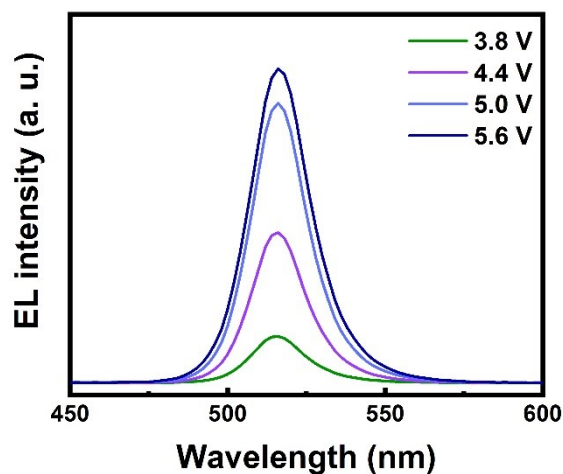

Fig. S4 EL spectra of QLED with toluene vapor annealed PEDOT:PSS films as the HTL at varied voltages. No change in the spectrum was observed.

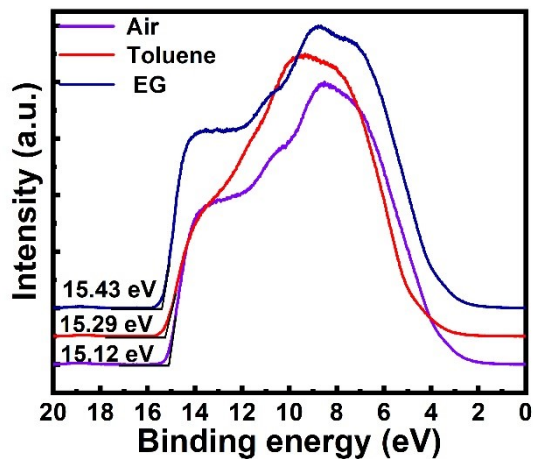

Fig. S5. UPS spectra of PEDOT:PSS films prepared by air annealing, toluene vapor annealing, and EG cleaning.

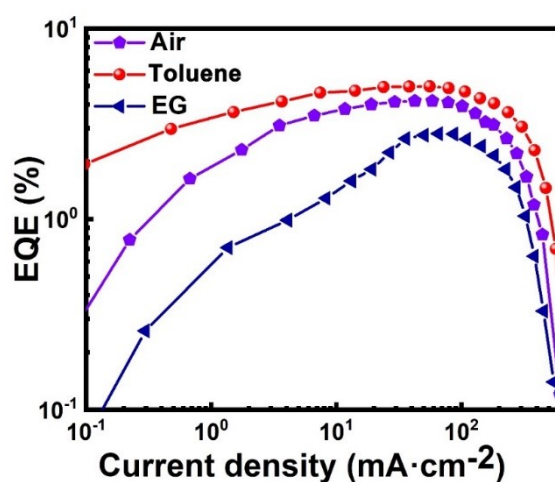

Fig. S6 EQE-voltage curves for CsPbBr<sub>3</sub> QLED devices with different treatments for the PEDOT:PSS layer.

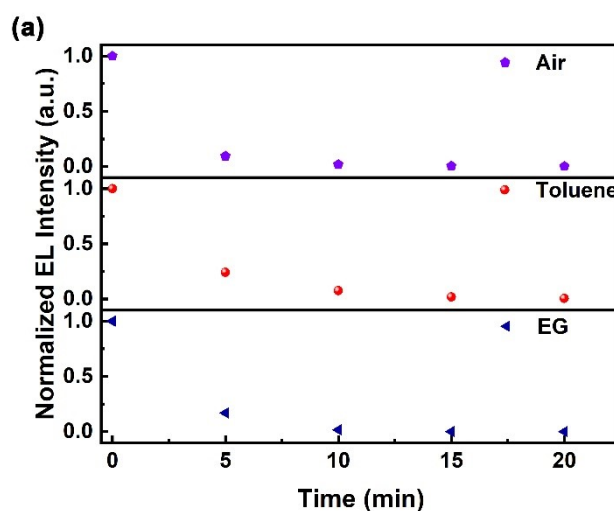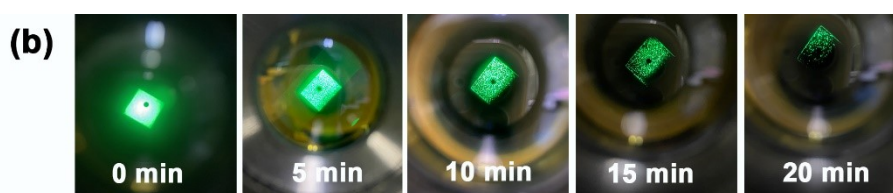

Fig. S7 (a) Normalized luminance versus time of the three types of QLEDs under a continuous bias of 6 V, (b) The photographs of the device of PEDOT:PSS films with toluene vapor annealing as HTL under a continuous bias of 6.0 V after different running periods. All the devices are without encapsulation.

Table S1. Summary of the performances of QLEDs based on CsPbBr<sub>3</sub> perovskite QDs.

| Year | EL peak (nm) | Max. EQE (%) | Max. L (cd/m <sup>2</sup> ) | Refs.           |
|------|--------------|--------------|-----------------------------|-----------------|
| 2015 | 516          | 0.12         | 946                         | [1]             |
| 2016 | 516          | 0.06         | 1377                        | [2]             |
| 2016 | 523          | 0.19         | 2335                        | [3]             |
| 2017 | 525          | 0.43         | 8911                        | [4]             |
| 2017 | 513          | 2.1          | 11990                       | [5]             |
| 2017 | 512          | 8.73         | 1660                        | [6]             |
| 2018 | 516          | 6.5          | 7085                        | [7]             |
| 2018 | 518          | 4.62         | 10206                       | [8]             |
| 2018 | 508          | 8.08         | 1000                        | [9]             |
| 2019 | 517          | 9.7          | 2270                        | [10]            |
| 2020 | 519          | 0.55         | 2011                        | [11]            |
| 2020 | 513          | 5.9          | 24458                       | [12]            |
| 2020 | 524          | 5.6          | 5760                        | [13]            |
| 2021 | 518          | ~            | 833                         | [14]            |
| 2021 | 516          | 6.05         | 32747                       | [15]            |
| 2021 | 517          | 4.81         | 92279                       | [16]            |
| 2021 | 525          | 4.98         | <b>31140</b>                | <b>Our work</b> |

## References:

- [1] Q. Shan, J. Li, J. Song, Y. Zou, L. Xu, J. Xue, Y. Dong, C. Huo, J. Chen, B. Han, H. Zeng, *J. Mater. Chem. C* 2017, **5**, 4565.
- [2] H. L. Zhu, J. Cheng, D. Zhang, C. Liang, C. J. Reckmeier, H. Huang, A. L. Rogach, W. C. H. Choy, *Acs Nano* 2016, **10**, 6808.
- [3] G. Li, F. W. R. Rivarola, N. J. L. K. Davis, S. Bai, T. C. Jellicoe, F. de la Peña, S. Hou, C. Ducati, F. Gao, R. H. Friend, N. C. Greenham, Z. Tan, *Adv. Mater.* 2016, **28**, 3528.
- [4] X. Zhang, B. Xu, W. Wang, S. Liu, Y. Zheng, S. Chen, K. Wang, X. W. Sun, *Acs Appl. Mater. Inter.* 2017, **9**, 4926.
- [5] H. Wu, Y. Zhang, M. Lu, X. Zhang, C. Sun, T. Zhang, V. L. Colvin, W. W. Yu, *Nanoscale* 2018, **10**, 4173.
- [6] T. Chiba, K. Hoshi, Y. Pu, Y. Takeda, Y. Hayashi, S. Ohisa, S. Kawata, J. Kido, *Acs Appl. Mater. Inter.* 2017, **9**, 18054.
- [7] Y. Tan, Y. Zou, L. Wu, Q. Huang, D. Yang, M. Chen, M. Ban, C. Wu, T. Wu, S. Bai, T. Song, Q. Zhang, B. Sun, *Acs Appl. Mater. Inter.* 2018, **10**, 3784.
- [8] Z. Shi, Y. Li, S. Li, X. Li, D. Wu, T. Xu, Y. Tian, Y. Chen, Y. Zhang, B. Zhang, *Adv. Funct. Mater.* 2018, **28**, 1707031.
- [9] M. Lu, X. Zhang, X. Bai, H. Wu, X. Shen, Y. Zhang, W. Zhang, W. Zheng, H. Song, W. W. Yu, A. L. Rogach, *ACS Energy Lett.* 2018, **3**, 1571.
- [10] J. H. Park, A.-Y. Lee, J. C. Yu, Y. S. Nam, Y. Choi, J. Park, M. H. Song, *ACS Appl. Mater. Inter.* 2019, **11**, 8428.
- [11] R. Shen, S. Yang, P. Lin, *ACS Appl. Electron. Mater.* 2020, **2**, 1619.
- [12] J. Yao, J. Zhang, L. Wang, K. Wang, X. Ru, J. Yang, J. Wang, X. Chen, Y. Song, Y. Yin, Y. Lan, Q. Zhang, H. Yao, *J. Phys. Chem. Lett.* 2020, **11**, 9371.
- [13] M. T. Hoang, A. S. Pannu, C. Tang, Y. Yang, N. D. Pham, K. Gui, X. Wang, S. Yambem, P. Sonar, A. Du, H. Wang, *Adv Opt. Mater.* 2020, **8**, 2000742.
- [14] H. Kim, S. R. Bae, T. H. Lee, H. Lee, H. Kang, S. Park, H. W. Jang, S. Y. Kim, *Adv Funct. Mater.* 2021, **31**, 2102770.
- [15] B. Zhou, P. Wang, S. Geng, M. Wang, L. Qin, Y. Wen, R. Chen, *ACS Appl. Electron. Mater.* 2021, **3**, 2398.
- [16] S. Geng, Y. Wen, B. Zhou, Z. Wang, Z. Wang, P. Wang, Y. Jing, K. Cao, K. Wang, R. Chen, *ACS Appl. Electron. Mater.* 2021, **3**, 2362.
- [17] S. Liu, X. Tong, J. Wei, W. Sun, Z. Yang, P. Ye, Y. Zhu, *Ieee T Ind. Electron.* 2021, **68**, 10449.
- [18] L. Xu, J. Li, B. Cai, J. Song, F. Zhang, T. Fang, H. Zeng, *Nat. Commun.* 2020, **11**, 3902.
